# Supplementary material
Source: Springer Nature journal article supplement (https://www.springermedizin.de/resource/supplementary/12874_2008_285_MOESM5_ESM.pdf/9434154)

Frequency

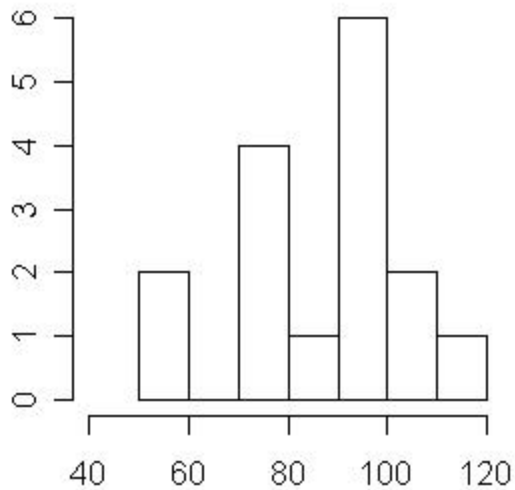

+/+

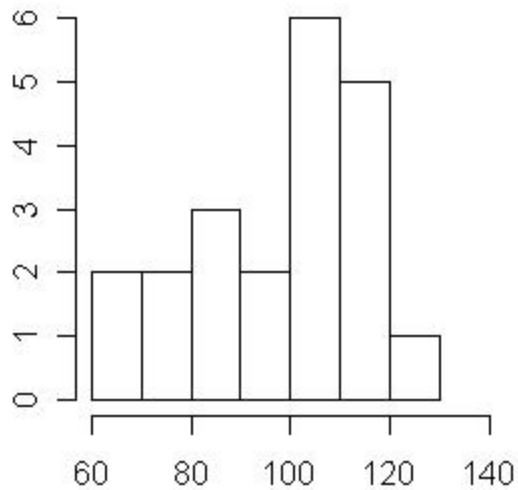

-/-

Supplement: MOESM5 [file 9434154]
